# Supplementary material for: A computational study of the mechanism of the photocyclization reaction of α-methylamino ketone
Source: Royal Society of Chemistry journal article supplement (doi:10.1039/c6ra15248a), 2016-01-01
Supplement: c6ra15248a1.pdf [file c6ra15248a1.pdf]

# Supplementary Materials

## A Computational Study of the Mechanism of the Photocyclization Reaction of $\alpha$ -Methylamino Ketone

Shih-Hao Su<sup>1</sup> and Ming-Der Su<sup>1,2\*</sup>

<sup>1</sup>Department of Applied Chemistry, National Chiayi University, Chiayi 60004,  
Taiwan

<sup>2</sup>Department of Medicinal and Applied Chemistry, Kaohsiung Medical  
University, Kaohsiung 80708, Taiwan

\*E-mail: midesu@mail.ncyu.edu.tw

### Table of Contents :

|                       |    |
|-----------------------|----|
| Table S1              | S2 |
| Table S2              | S4 |
| Figure S2 (structure) | S7 |
| Cartesian Coordinates | S9 |

**Table S1.** The vertical excitation energies and oscillator strengths for the fifteen lowest energy triplet excited states of molecule **1** at the TD-DFT/M06-L/6-311G(d,p).

|               |     |            |           |            |           |              |
|---------------|-----|------------|-----------|------------|-----------|--------------|
| Excited State | 1:  | 3.009-?Sym | 0.3744 eV | 3311.50 nm | f=0.0000  | <S**2>=2.014 |
|               |     | 78B -> 80B | 0.82332   |            |           |              |
|               |     | 79B -> 80B | -0.56831  |            |           |              |
| Excited State | 2:  | 3.009-?Sym | 0.3883 eV | 3193.08 nm | f=0.0000  | <S**2>=2.013 |
|               |     | 81A -> 85A | 0.15334   |            |           |              |
|               |     | 78B -> 80B | 0.56555   |            |           |              |
|               |     | 79B -> 80B | 0.81574   |            |           |              |
|               |     | 81A <- 85A | 0.11608   |            |           |              |
| Excited State | 3:  | 3.010-?Sym | 0.7904 eV | 1568.72 nm | f=0.0001  | <S**2>=2.015 |
|               |     | 77B -> 80B | 0.99736   |            |           |              |
| Excited State | 4:  | 3.010-?Sym | 1.0367 eV | 1195.90 nm | f=0.0005  | <S**2>=2.015 |
|               |     | 81A -> 82A | 0.99956   |            |           |              |
| Excited State | 5:  | 3.011-?Sym | 1.1236 eV | 1103.50 nm | f=0.0001  | <S**2>=2.017 |
|               |     | 76B -> 80B | 0.99600   |            |           |              |
| Excited State | 6:  | 3.011-?Sym | 1.2185 eV | 1017.55 nm | f=0.0000  | <S**2>=2.017 |
|               |     | 75B -> 80B | 0.99871   |            |           |              |
| Excited State | 7:  | 3.010-?Sym | 1.4497 eV | 855.22 nm  | f=0.0004  | <S**2>=2.015 |
|               |     | 81A -> 83A | 0.99994   |            |           |              |
| Excited State | 8:  | 3.011-?Sym | 1.9779 eV | 626.83 nm  | f=0.0009  | <S**2>=2.017 |
|               |     | 81A -> 84A | 0.99321   |            |           |              |
| Excited State | 9:  | 3.011-?Sym | 2.0381 eV | 608.32 nm  | f=0.00009 | <S**2>=2.017 |
|               |     | 73B -> 80B | 0.99921   |            |           |              |
| Excited State | 10: | 3.013-?Sym | 2.9240 eV | 424.02 nm  | f=0.0002  | <S**2>=2.020 |
|               |     | 81A -> 85A | -0.15577  |            |           |              |
|               |     | 68B -> 80B | 0.75667   |            |           |              |
|               |     | 69B -> 80B | -0.41677  |            |           |              |
|               |     | 70B -> 80B | -0.44828  |            |           |              |
| Excited State | 11: | 3.013-?Sym | 3.1597 eV | 392.39 nm  | f=0.0433  | <S**2>=2.020 |
|               |     | 81A -> 85A | -0.29186  |            |           |              |
|               |     | 67B -> 80B | 0.88544   |            |           |              |
|               |     | 68B -> 80B | -0.25921  |            |           |              |
|               |     | 69B -> 80B | -0.20649  |            |           |              |
| Excited State | 12: | 3.034-?Sym | 3.2088 eV | 386.39 nm  | f=0.1165  | <S**2>=2.052 |
|               |     | 81A -> 85A | 0.65899   |            |           |              |
|               |     | 67B -> 80B | 0.44444   |            |           |              |
|               |     | 68B -> 80B | 0.25811   |            |           |              |

|                   |            |           |           |          |              |
|-------------------|------------|-----------|-----------|----------|--------------|
| 69B -> 80B        | 0.39204    |           |           |          |              |
| 78B -> 82B        | -0.26623   |           |           |          |              |
| 79B -> 82B        | -0.15817   |           |           |          |              |
| Excited State 13: | 3.018-?Sym | 3.5132 eV | 352.91 nm | f=0.0042 | <S**2>=2.028 |
| 64B -> 80B        | -0.11466   |           |           |          |              |
| 65B -> 80B        | 0.45937    |           |           |          |              |
| 66B -> 80B        | 0.83400    |           |           |          |              |
| 68B -> 80B        | -0.17382   |           |           |          |              |
| 70B -> 80B        | -0.11264   |           |           |          |              |
| Excited State 14: | 4.101-?Sym | 3.6597 eV | 338.78 nm | f=0.0000 | <S**2>=3.955 |
| 76A -> 82A        | 0.11707    |           |           |          |              |
| 76A -> 83A        | 0.32004    |           |           |          |              |
| 77A -> 82A        | -0.40764   |           |           |          |              |
| 77A -> 83A        | 0.10867    |           |           |          |              |
| 79A -> 82A        | -0.31284   |           |           |          |              |
| 80A -> 82A        | -0.30341   |           |           |          |              |
| 81A -> 86A        | 0.13069    |           |           |          |              |
| 75B -> 83B        | 0.32861    |           |           |          |              |
| 76B -> 81B        | 0.43200    |           |           |          |              |
| 77B -> 81B        | 0.39492    |           |           |          |              |
| 79B -> 81B        | -0.12192   |           |           |          |              |
| Excited State 15: | 3.032-?Sym | 3.6874 eV | 336.24 nm | f=0.0006 | <S**2>=2.049 |
| 81A -> 86A        | 0.98754    |           |           |          |              |

---

**Table S2.** The vertical excitation energies and oscillator strengths for the fifteen lowest energy singlet excited states of molecule **1** at the TD-DFT/M06-L/6-311G(d,p).

|                   |              |           |           |          |              |
|-------------------|--------------|-----------|-----------|----------|--------------|
| Excited State 1:  | Singlet-?Sym | 3.6563 eV | 339.10 nm | f=0.0004 | <S**2>=0.000 |
| 80 -> 81          | 0.70101      |           |           |          |              |
| Excited State 2:  | Singlet-?Sym | 3.9300 eV | 315.48 nm | f=0.0000 | <S**2>=0.000 |
| 79 -> 81          | 0.69724      |           |           |          |              |
| Excited State 3:  | Singlet-?Sym | 4.3311 eV | 286.26 nm | f=0.0000 | <S**2>=0.000 |
| 79 -> 82          | 0.12798      |           |           |          |              |
| 80 -> 82          | 0.68758      |           |           |          |              |
| Excited State 4:  | Singlet-?Sym | 4.3453 eV | 285.33 nm | f=0.0000 | <S**2>=0.000 |
| 77 -> 81          | 0.51421      |           |           |          |              |
| 78 -> 81          | -0.47321     |           |           |          |              |
| Excited State 5:  | Singlet-?Sym | 4.4583 eV | 278.10 nm | f=0.0000 | <S**2>=0.000 |
| 75 -> 81          | 0.69958      |           |           |          |              |
| Excited State 6:  | Singlet-?Sym | 4.6037 eV | 269.31 nm | f=0.0146 | <S**2>=0.000 |
| 77 -> 82          | -0.11243     |           |           |          |              |
| 78 -> 82          | 0.12171      |           |           |          |              |
| 79 -> 82          | 0.67613      |           |           |          |              |
| 80 -> 82          | -0.10434     |           |           |          |              |
| Excited State 7:  | Singlet-?Sym | 4.6496 eV | 266.65 nm | f=0.0165 | <S**2>=0.000 |
| 76 -> 81          | 0.49917      |           |           |          |              |
| 76 -> 84          | 0.14052      |           |           |          |              |
| 77 -> 81          | -0.23846     |           |           |          |              |
| 77 -> 84          | 0.13825      |           |           |          |              |
| 78 -> 81          | -0.34048     |           |           |          |              |
| 78 -> 84          | 0.12505      |           |           |          |              |
| Excited State 8:  | Singlet-?Sym | 4.7207 eV | 262.64 nm | f=0.0101 | <S**2>=0.000 |
| 80 -> 83          | 0.69645      |           |           |          |              |
| Excited State 9:  | Singlet-?Sym | 4.8009 eV | 258.25 nm | f=0.0031 | <S**2>=0.000 |
| 80 -> 84          | 0.70009      |           |           |          |              |
| Excited State 10: | Singlet-?Sym | 4.9712 eV | 249.40 nm | f=0.0016 | <S**2>=0.000 |
| 75 -> 82          | -0.16004     |           |           |          |              |
| 79 -> 83          | 0.68511      |           |           |          |              |
| Excited State 11: | Singlet-?Sym | 5.0048 eV | 247.73 nm | f=0.0145 | <S**2>=0.000 |
| 74 -> 81          | 0.28896      |           |           |          |              |
| 77 -> 82          | 0.40908      |           |           |          |              |
| 78 -> 82          | 0.46364      |           |           |          |              |

|                   |              |           |           |          |              |  |
|-------------------|--------------|-----------|-----------|----------|--------------|--|
|                   | 79 -> 84     | -0.10603  |           |          |              |  |
| Excited State 12: | Singlet-?Sym | 5.0097 eV | 247.49 nm | f=0.0425 | <S**2>=0.000 |  |
|                   | 74 -> 81     | 0.58568   |           |          |              |  |
|                   | 77 -> 82     | -0.19382  |           |          |              |  |
|                   | 78 -> 82     | -0.27381  |           |          |              |  |
|                   | 79 -> 84     | -0.13797  |           |          |              |  |
| Excited State 13: | Singlet-?Sym | 5.0426 eV | 245.87 nm | f=0.0167 | <S**2>=0.000 |  |
|                   | 74 -> 81     | 0.24456   |           |          |              |  |
|                   | 76 -> 81     | 0.15372   |           |          |              |  |
|                   | 77 -> 81     | 0.16789   |           |          |              |  |
|                   | 78 -> 81     | 0.15641   |           |          |              |  |
|                   | 79 -> 84     | 0.59336   |           |          |              |  |
| Excited State 14: | Singlet-?Sym | 5.0916 eV | 243.51 nm | f=0.0022 | <S**2>=0.000 |  |
|                   | 76 -> 82     | 0.68901   |           |          |              |  |
|                   | 77 -> 82     | 0.10925   |           |          |              |  |
| Excited State 15: | Singlet-?Sym | 5.1462 eV | 240.92 nm | f=0.2518 | <S**2>=0.000 |  |
|                   | 73 -> 81     | 0.15576   |           |          |              |  |
|                   | 76 -> 81     | 0.35222   |           |          |              |  |
|                   | 77 -> 81     | 0.31967   |           |          |              |  |
|                   | 78 -> 81     | 0.28214   |           |          |              |  |
|                   | 78 -> 84     | 0.13869   |           |          |              |  |
|                   | 79 -> 84     | -0.32453  |           |          |              |  |

---

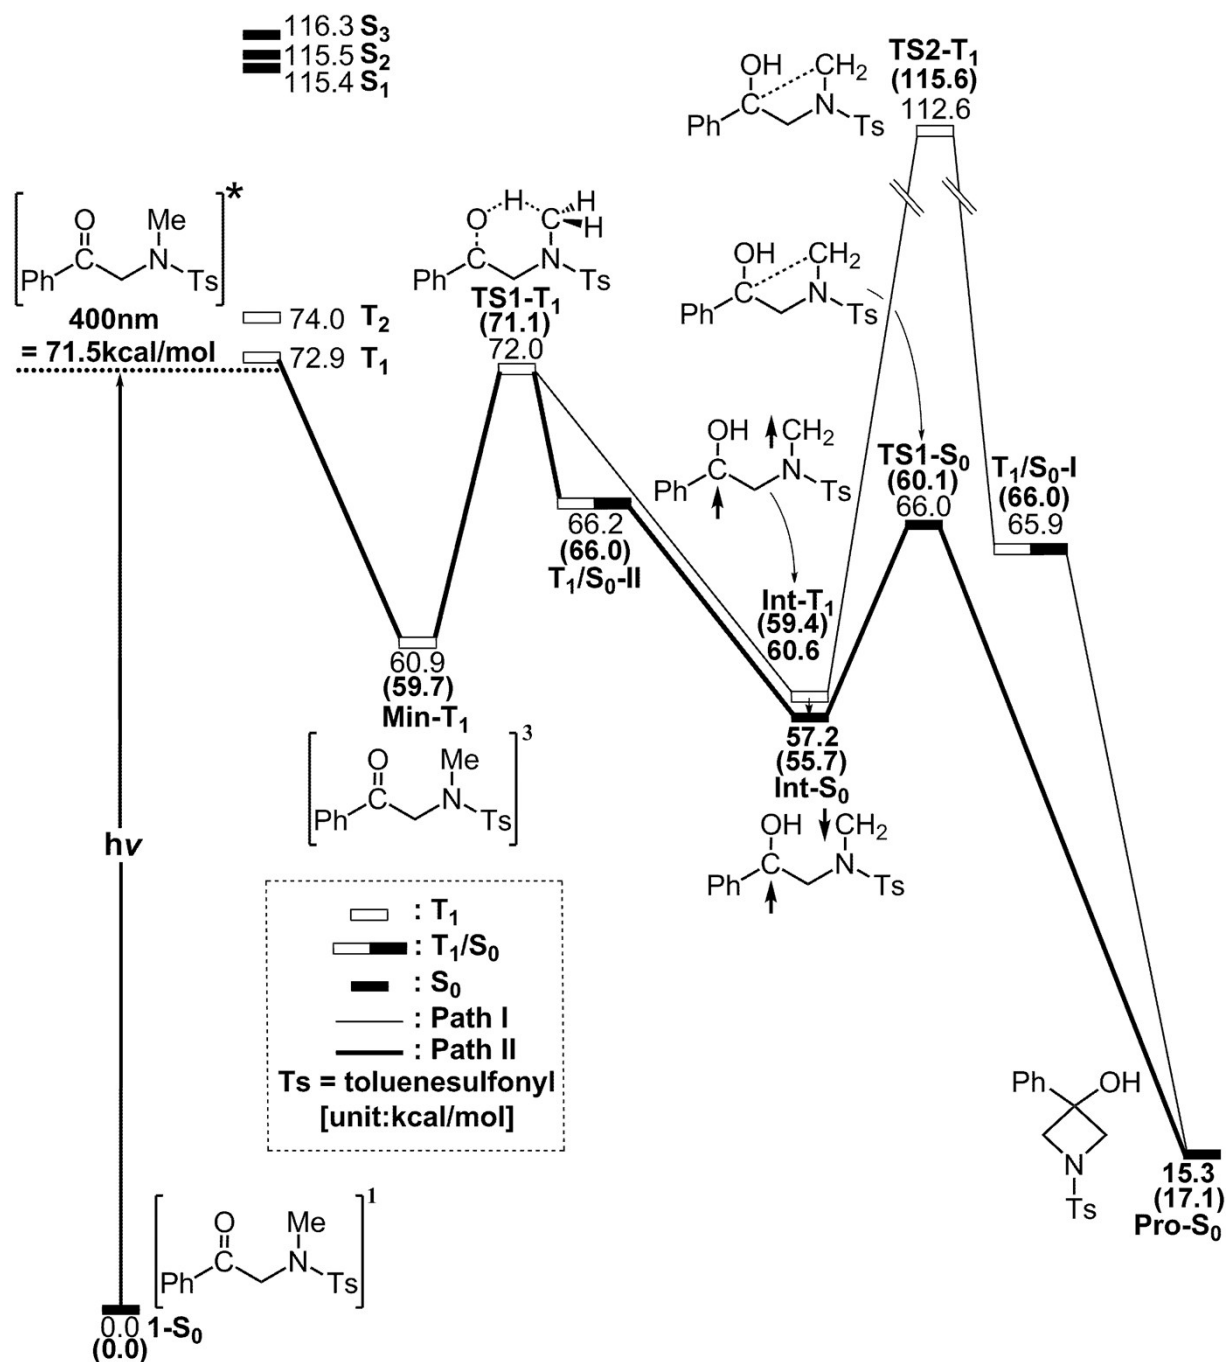

**Figure S1** The energy profiles for the photochemical cyclization addition of  $\alpha$ -*N*-methylamidoacetophenone (**1**). The relative energies are obtained at the M06-L/6-311G(d,p) level of theory. All energies (in kcal/mol) are given with respect to the reactant (**1**). The solvent effect (SCRF = PCM, solvent = DMA) have been considered using the For the M06-L/6-311G(d,p) + PCM(solvent) = DMA//M06-L/6-311G(d,p) method, whose computational values are given in the parenthesis. For more information, see IV Conclusion.

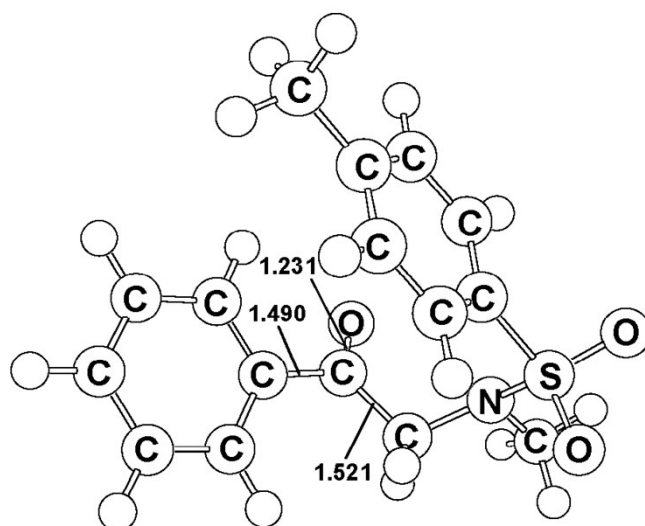

**side view :**

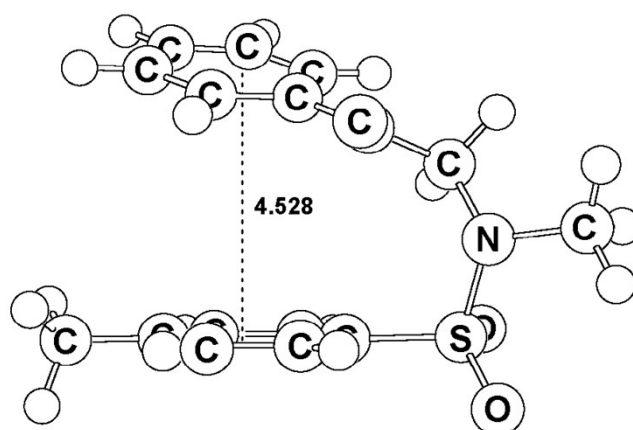

| Atomic<br>Number | Coordinates (Angstroms) |           |           |
|------------------|-------------------------|-----------|-----------|
|                  | X                       | Y         | Z         |
| 6                | -0.146802               | -1.601922 | 0.930757  |
| 8                | -0.015969               | -1.392477 | 2.137035  |
| 6                | 1.030405                | -1.904225 | 0.016696  |
| 1                | 0.780771                | -1.694954 | -1.026732 |
| 1                | 1.234581                | -2.978638 | 0.087309  |
| 7                | 2.217418                | -1.104178 | 0.427803  |
| 6                | 3.402479                | -1.935999 | 0.704242  |
| 1                | 3.150036                | -2.713097 | 1.433228  |
| 1                | 4.204476                | -1.337115 | 1.145015  |
| 1                | 3.763669                | -2.415729 | -0.210296 |
| 16               | 2.538931                | 0.282832  | -0.504811 |

|   |           |           |           |
|---|-----------|-----------|-----------|
| 8 | 3.636517  | 1.004899  | 0.100613  |
| 8 | 2.600844  | -0.147195 | -1.887482 |
| 6 | -1.516053 | -1.569380 | 0.341825  |
| 6 | -4.111186 | -1.425439 | -0.694958 |
| 6 | -2.498705 | -0.812889 | 0.994218  |
| 6 | -1.845953 | -2.269133 | -0.825095 |
| 6 | -3.142307 | -2.192356 | -1.341511 |
| 6 | -3.791208 | -0.737751 | 0.473929  |
| 1 | -2.256357 | -0.269550 | 1.906058  |
| 1 | -1.123460 | -2.892286 | -1.343610 |
| 1 | -3.400333 | -2.735755 | -2.247782 |
| 1 | -4.546265 | -0.143291 | 0.982275  |
| 1 | -5.119225 | -1.368701 | -1.099078 |
| 6 | 1.072183  | 1.256575  | -0.286665 |
| 6 | -1.262567 | 2.737955  | 0.101215  |
| 6 | 0.783149  | 1.770413  | 0.979199  |
| 6 | 0.220885  | 1.496427  | -1.367332 |
| 6 | -0.944354 | 2.238778  | -1.169669 |
| 6 | -0.382763 | 2.512661  | 1.168944  |
| 1 | 1.450893  | 1.581974  | 1.817735  |
| 1 | 0.452924  | 1.114213  | -2.358498 |
| 1 | -1.606087 | 2.425800  | -2.013011 |
| 1 | -0.604130 | 2.907669  | 2.158419  |
| 6 | -2.504376 | 3.555528  | 0.304082  |
| 1 | -2.289654 | 4.613302  | 0.124160  |
| 1 | -2.885919 | 3.439299  | 1.323957  |
| 1 | -3.298836 | 3.233504  | -0.377389 |

-----

**Figure S2** The geometrical (bond length, Å) conformation with the two aromatic rings stacking for  $\alpha$ -*N*-methylamidoacetophenone at the M06-L/6-311G(d,p) level of theory. Its Cartesian coordinate is given as well. The computational result indicates that the energy of this two-rings-stacked structure is above the initial reactant (**1-S<sub>0</sub>**) by 10.2 kcal/mol.



**(All were calculated at the M06-L/6-311G(d,p) level of theory)**

1. 1-S<sub>0</sub>

| -----  |                         |           |           |
|--------|-------------------------|-----------|-----------|
| Atomic | Coordinates (Angstroms) |           |           |
| Number | X                       | Y         | Z         |
| -----  |                         |           |           |
| 1      | -2.927466               | 2.528514  | -0.050430 |
| 6      | -3.650373               | 1.722067  | -0.113035 |
| 6      | -5.454401               | -0.391871 | -0.233225 |
| 6      | -3.247563               | 0.446097  | 0.296165  |
| 6      | -4.932005               | 1.934407  | -0.596157 |
| 6      | -5.836874               | 0.877153  | -0.656150 |
| 6      | -4.162739               | -0.610057 | 0.231937  |
| 1      | -5.229131               | 2.923430  | -0.930787 |
| 1      | -6.840841               | 1.042210  | -1.035512 |
| 1      | -3.879725               | -1.606532 | 0.558502  |
| 1      | -6.162106               | -1.213673 | -0.272585 |
| 6      | -1.855374               | 0.285174  | 0.793913  |
| 8      | -1.181291               | 1.243190  | 1.110860  |
| 6      | -1.314667               | -1.139892 | 0.934806  |
| 1      | -1.759308               | -1.805771 | 0.182183  |
| 1      | -1.632634               | -1.524693 | 1.912451  |
| 7      | 0.143180                | -1.164942 | 0.910025  |
| 6      | 0.791453                | -2.149557 | 1.764990  |
| 1      | 0.506180                | -1.952009 | 2.800398  |
| 1      | 1.875490                | -2.034107 | 1.693061  |
| 1      | 0.536707                | -3.185360 | 1.506465  |
| 16     | 0.765702                | -1.093158 | -0.663417 |
| 8      | 1.119510                | -2.420093 | -1.148328 |
| 8      | -0.178136               | -0.265819 | -1.396730 |
| 6      | 2.277565                | -0.204345 | -0.380537 |
| 6      | 4.641767                | 1.206237  | 0.019086  |
| 6      | 2.224243                | 1.056195  | 0.208581  |
| 6      | 3.483486                | -0.771642 | -0.773630 |
| 6      | 4.658877                | -0.059638 | -0.570915 |
| 6      | 3.409547                | 1.749421  | 0.404045  |
| 1      | 1.266788                | 1.465157  | 0.521140  |
| 1      | 3.487692                | -1.756491 | -1.227982 |
| 1      | 5.607340                | -0.496671 | -0.870981 |

|   |          |          |           |
|---|----------|----------|-----------|
| 1 | 3.384009 | 2.730478 | 0.870332  |
| 6 | 5.913239 | 1.972401 | 0.216675  |
| 1 | 5.854736 | 2.637370 | 1.080660  |
| 1 | 6.134010 | 2.596612 | -0.655694 |
| 1 | 6.767011 | 1.305535 | 0.357560  |

-----  
M06L/6-311G\*\* = -1298.6085446

2. FC-T<sub>1</sub>

-----

| Atomic<br>Number | Coordinates (Angstroms) |           |           |
|------------------|-------------------------|-----------|-----------|
|                  | X                       | Y         | Z         |
| 1                | -2.927466               | 2.528514  | -0.050430 |
| 6                | -3.650373               | 1.722067  | -0.113035 |
| 6                | -5.454401               | -0.391871 | -0.233225 |
| 6                | -3.247563               | 0.446097  | 0.296165  |
| 6                | -4.932005               | 1.934407  | -0.596157 |
| 6                | -5.836874               | 0.877153  | -0.656150 |
| 6                | -4.162739               | -0.610057 | 0.231937  |
| 1                | -5.229131               | 2.923430  | -0.930787 |
| 1                | -6.840841               | 1.042210  | -1.035512 |
| 1                | -3.879725               | -1.606532 | 0.558502  |
| 1                | -6.162106               | -1.213673 | -0.272585 |
| 6                | -1.855374               | 0.285174  | 0.793913  |
| 8                | -1.181291               | 1.243190  | 1.110860  |
| 6                | -1.314667               | -1.139892 | 0.934806  |
| 1                | -1.759308               | -1.805771 | 0.182183  |
| 1                | -1.632634               | -1.524693 | 1.912451  |
| 7                | 0.143180                | -1.164942 | 0.910025  |
| 6                | 0.791453                | -2.149557 | 1.764990  |
| 1                | 0.506180                | -1.952009 | 2.800398  |
| 1                | 1.875490                | -2.034107 | 1.693061  |
| 1                | 0.536707                | -3.185360 | 1.506465  |
| 16               | 0.765702                | -1.093158 | -0.663417 |
| 8                | 1.119510                | -2.420093 | -1.148328 |
| 8                | -0.178136               | -0.265819 | -1.396730 |
| 6                | 2.277565                | -0.204345 | -0.380537 |
| 6                | 4.641767                | 1.206237  | 0.019086  |
| 6                | 2.224243                | 1.056195  | 0.208581  |

|   |          |           |           |
|---|----------|-----------|-----------|
| 6 | 3.483486 | -0.771642 | -0.773630 |
| 6 | 4.658877 | -0.059638 | -0.570915 |
| 6 | 3.409547 | 1.749421  | 0.404045  |
| 1 | 1.266788 | 1.465157  | 0.521140  |
| 1 | 3.487692 | -1.756491 | -1.227982 |
| 1 | 5.607340 | -0.496671 | -0.870981 |
| 1 | 3.384009 | 2.730478  | 0.870332  |
| 6 | 5.913239 | 1.972401  | 0.216675  |
| 1 | 5.854736 | 2.637370  | 1.080660  |
| 1 | 6.134010 | 2.596612  | -0.655694 |
| 1 | 6.767011 | 1.305535  | 0.357560  |

-----  
M06L/6-311G\*\* = -1298.4855165

### 3. Min-T<sub>1</sub>

| Atomic<br>Number | Coordinates (Angstroms) |           |           |
|------------------|-------------------------|-----------|-----------|
|                  | X                       | Y         | Z         |
| 1                | -4.548686               | 1.709421  | 0.852084  |
| 6                | -4.503658               | 0.676401  | 0.522750  |
| 6                | -4.347478               | -1.970249 | -0.316696 |
| 6                | -3.358640               | 0.245597  | -0.202666 |
| 6                | -5.531225               | -0.200148 | 0.804586  |
| 6                | -5.471018               | -1.531956 | 0.388431  |
| 6                | -3.307714               | -1.109238 | -0.615222 |
| 1                | -6.394327               | 0.155213  | 1.359892  |
| 1                | -6.279851               | -2.218151 | 0.615372  |
| 1                | -2.437413               | -1.498184 | -1.131391 |
| 1                | -4.277741               | -3.007147 | -0.631684 |
| 6                | -2.328190               | 1.198296  | -0.456914 |
| 8                | -2.373770               | 2.418808  | -0.054117 |
| 6                | -1.132359               | 0.913024  | -1.394833 |
| 1                | -1.136142               | 1.669631  | -2.186534 |
| 1                | -1.274567               | -0.073403 | -1.834375 |
| 7                | 0.170034                | 0.976329  | -0.772023 |
| 6                | 0.551188                | 2.284800  | -0.272684 |
| 1                | 0.504051                | 2.998441  | -1.100669 |
| 1                | 1.573854                | 2.258817  | 0.113895  |
| 1                | -0.140787               | 2.624363  | 0.515407  |

|    |          |           |           |
|----|----------|-----------|-----------|
| 16 | 0.545636 | -0.344528 | 0.274945  |
| 8  | 0.170757 | -0.030077 | 1.641969  |
| 8  | 0.033866 | -1.511051 | -0.419955 |
| 6  | 2.318401 | -0.320950 | 0.177480  |
| 6  | 5.099786 | -0.318668 | 0.047634  |
| 6  | 2.946360 | -0.688500 | -1.009642 |
| 6  | 3.052883 | 0.047694  | 1.298707  |
| 6  | 4.439500 | 0.044356  | 1.224669  |
| 6  | 4.331366 | -0.681361 | -1.065534 |
| 1  | 2.352669 | -0.979720 | -1.870424 |
| 1  | 2.532249 | 0.324331  | 2.209694  |
| 1  | 5.021725 | 0.329509  | 2.096714  |
| 1  | 4.831255 | -0.965276 | -1.987682 |
| 6  | 6.595014 | -0.349802 | -0.011414 |
| 1  | 6.966050 | -0.136851 | -1.016127 |
| 1  | 6.973578 | -1.339135 | 0.266937  |
| 1  | 7.041561 | 0.369066  | 0.678844  |

-----  
M06L/6-311G\*\* = -1298.5114358

#### 4. TS1-T<sub>1</sub>

| Atomic<br>Number | Coordinates (Angstroms) |           |           |
|------------------|-------------------------|-----------|-----------|
|                  | X                       | Y         | Z         |
| 1                | 4.730979                | -0.970729 | 0.037306  |
| 6                | 4.406980                | 0.063909  | 0.037915  |
| 6                | 3.557111                | 2.713151  | 0.014828  |
| 6                | 3.025607                | 0.339916  | -0.156459 |
| 6                | 5.319283                | 1.085597  | 0.205002  |
| 6                | 4.910025                | 2.422136  | 0.198114  |
| 6                | 2.628419                | 1.703258  | -0.164945 |
| 1                | 6.370103                | 0.843690  | 0.338196  |
| 1                | 5.631977                | 3.220926  | 0.331197  |
| 1                | 1.585766                | 1.972030  | -0.307621 |
| 1                | 3.224614                | 3.747403  | 0.011305  |
| 6                | 2.115081                | -0.735351 | -0.345678 |
| 8                | 2.564313                | -1.980207 | -0.309000 |
| 6                | 0.694884                | -0.483735 | -0.835076 |

|    |           |           |           |
|----|-----------|-----------|-----------|
| 1  | 0.706840  | -0.193515 | -1.900700 |
| 1  | 0.241535  | 0.355469  | -0.295758 |
| 7  | -0.174551 | -1.643474 | -0.703765 |
| 6  | 0.390718  | -2.876684 | -1.083510 |
| 16 | -1.268322 | -1.676711 | 0.643871  |
| 8  | -2.038456 | -2.886849 | 0.437658  |
| 8  | -0.547368 | -1.423669 | 1.876083  |
| 6  | -2.255257 | -0.247751 | 0.275321  |
| 6  | -3.850512 | 1.980767  | -0.225640 |
| 6  | -2.295642 | 0.786560  | 1.203919  |
| 6  | -3.005911 | -0.194696 | -0.897462 |
| 6  | -3.790118 | 0.922541  | -1.141061 |
| 6  | -3.096232 | 1.890654  | 0.946771  |
| 1  | -1.703652 | 0.713773  | 2.109990  |
| 1  | -2.972376 | -1.015243 | -1.607078 |
| 1  | -4.371283 | 0.978808  | -2.057307 |
| 1  | -3.132987 | 2.701386  | 1.668676  |
| 6  | -4.721633 | 3.170892  | -0.479551 |
| 1  | -4.332321 | 4.064883  | 0.011620  |
| 1  | -5.731447 | 3.004876  | -0.089100 |
| 1  | -4.821729 | 3.382503  | -1.545842 |
| 1  | 1.601760  | -2.698538 | -0.622265 |
| 1  | 0.583682  | -2.958794 | -2.159305 |
| 1  | -0.121191 | -3.738404 | -0.651758 |

-----  
M06L/6-311G\*\* = -1298.4938651

5. T<sub>1</sub>/S<sub>0</sub>-II

| Atomic<br>Number | Coordinates (Angstroms) |            |            |
|------------------|-------------------------|------------|------------|
|                  | X                       | Y          | Z          |
| 1                | 4.7234453               | -1.1727522 | 0.2626080  |
| 6                | 4.5084340               | -0.1198782 | 0.1205380  |
| 6                | 3.9146657               | 2.5798690  | -0.2337360 |
| 6                | 3.1549598               | 0.2764755  | -0.0220106 |
| 6                | 5.5244570               | 0.8137348  | 0.0786545  |
| 6                | 5.2415337               | 2.1708519  | -0.0982719 |
| 6                | 2.8860391               | 1.6580951  | -0.1976681 |

|    |            |            |            |
|----|------------|------------|------------|
| 1  | 6.5539230  | 0.4869529  | 0.1861565  |
| 1  | 6.0443536  | 2.8994443  | -0.1290374 |
| 1  | 1.8626675  | 2.0050461  | -0.2987109 |
| 1  | 3.6831444  | 3.6319338  | -0.3687243 |
| 6  | 2.1096871  | -0.6761103 | 0.0732348  |
| 8  | 2.3950723  | -1.9424317 | 0.3402396  |
| 6  | 0.6742485  | -0.3139633 | -0.1630591 |
| 1  | 0.6016894  | 0.3876915  | -1.0047755 |
| 1  | 0.2553585  | 0.2078167  | 0.7075672  |
| 7  | -0.1760321 | -1.4669684 | -0.4482668 |
| 6  | 0.3379353  | -2.5312814 | -1.2022860 |
| 16 | -1.4374905 | -1.7681129 | 0.6780289  |
| 8  | -2.1109721 | -2.9517382 | 0.1899726  |
| 8  | -0.9041734 | -1.6687496 | 2.0227232  |
| 6  | -2.4277887 | -0.3303082 | 0.3709665  |
| 6  | -3.8258313 | 2.0040921  | -0.2203351 |
| 6  | -2.3928321 | 0.7326243  | 1.2675382  |
| 6  | -3.1634658 | -0.2544338 | -0.8096955 |
| 6  | -3.8580371 | 0.9086245  | -1.0933847 |
| 6  | -3.0943011 | 1.8924015  | 0.9631604  |
| 1  | -1.8244211 | 0.6396597  | 2.1869309  |
| 1  | -3.1821526 | -1.0996424 | -1.4898509 |
| 1  | -4.4325597 | 0.9794752  | -2.0124174 |
| 1  | -3.0677311 | 2.7311611  | 1.6531206  |
| 6  | -4.5777206 | 3.2555667  | -0.5458257 |
| 1  | -4.1721056 | 4.1188238  | -0.0155930 |
| 1  | -5.6312489 | 3.1653514  | -0.2617704 |
| 1  | -4.5550627 | 3.4700423  | -1.6162755 |
| 1  | 1.7115961  | -2.5383986 | -0.1386295 |
| 1  | 0.8647995  | -2.2009987 | -2.0983463 |
| 1  | -0.3376650 | -3.3724892 | -1.2978892 |

Difference Gradient:

|    |             |             |             |
|----|-------------|-------------|-------------|
| -1 | 0.00022141  | -0.00000389 | -0.00002679 |
| -2 | 0.00598583  | -0.00130143 | 0.00020146  |
| -3 | -0.00074372 | -0.00155811 | -0.00375763 |
| -4 | -0.01917020 | -0.00876210 | 0.02405816  |
| -5 | -0.00207285 | -0.00315995 | -0.00078933 |
| -6 | 0.00268722  | 0.00379691  | 0.00013634  |
| -7 | -0.00149737 | 0.00544191  | -0.00097508 |
| -8 | 0.00036295  | -0.00012730 | 0.00012645  |

|     |             |             |             |
|-----|-------------|-------------|-------------|
| -9  | 0.00026403  | 0.00034246  | 0.00034738  |
| -10 | -0.00074083 | 0.00025570  | 0.00194815  |
| -11 | -0.00010210 | 0.00062330  | -0.00013990 |
| -12 | -0.00445134 | 0.04291085  | -0.04034333 |
| -13 | 0.00144300  | -0.10683293 | -0.00508932 |
| -14 | -0.00431030 | 0.01891100  | -0.01774767 |
| -15 | -0.00262259 | 0.00455469  | -0.00302645 |
| -16 | -0.00480340 | 0.00202589  | -0.00026318 |
| -17 | 0.02303910  | -0.02796172 | 0.00070783  |
| -18 | -0.05449184 | 0.03877813  | -0.02036963 |
| -19 | -0.00914213 | 0.00082348  | 0.01382199  |
| -20 | 0.00182104  | -0.00213320 | -0.00152732 |
| -21 | 0.00008598  | -0.00186496 | -0.00604925 |
| -22 | -0.00151587 | 0.00310462  | -0.00112223 |
| -23 | -0.00119477 | -0.00143146 | -0.00292378 |
| -24 | -0.00224653 | -0.00043336 | -0.00022809 |
| -25 | 0.00208700  | -0.00166102 | 0.00126638  |
| -26 | -0.00067868 | 0.00266615  | 0.00071445  |
| -27 | 0.00122718  | -0.00224359 | 0.00241144  |
| -28 | 0.00073359  | 0.00056701  | -0.00045413 |
| -29 | -0.00042726 | 0.00024331  | -0.00012756 |
| -30 | 0.00003658  | 0.00002386  | 0.00001955  |
| -31 | 0.00007780  | -0.00034384 | -0.00000265 |
| -32 | 0.00023873  | 0.00019584  | -0.00017170 |
| -33 | 0.00003796  | -0.00012141 | -0.00004686 |
| -34 | 0.00012856  | -0.00016221 | 0.00013154  |
| -35 | 0.00002829  | -0.00007227 | 0.00009011  |
| -36 | 0.06084349  | 0.04553702  | 0.05021666  |
| -37 | 0.00676959  | -0.00648102 | 0.00704833  |
| -38 | 0.00209245  | -0.00414636 | 0.00193563  |

-----  
M06L/6-311G\*\* = -1298.5030820700

6. Int-S<sub>0</sub>

-----  
Atomic Coordinates (Angstroms)  
Number X Y Z  
-----  
1 2.600422 -2.037144 0.941453

|    |           |           |           |
|----|-----------|-----------|-----------|
| 6  | 3.195029  | -1.302396 | 0.403365  |
| 6  | 4.750419  | 0.573694  | -0.945960 |
| 6  | 2.574855  | -0.122578 | -0.082032 |
| 6  | 4.544274  | -1.525479 | 0.215446  |
| 6  | 5.334909  | -0.599102 | -0.476292 |
| 6  | 3.401942  | 0.821212  | -0.743539 |
| 1  | 4.992783  | -2.436636 | 0.599343  |
| 1  | 6.385860  | -0.799895 | -0.657639 |
| 1  | 2.953737  | 1.709910  | -1.178829 |
| 1  | 5.345836  | 1.289605  | -1.507192 |
| 6  | 1.174125  | 0.113468  | 0.073656  |
| 8  | 0.647974  | 1.329017  | -0.251787 |
| 6  | 0.171081  | -0.964773 | -0.076719 |
| 1  | 0.628204  | -1.945383 | 0.108469  |
| 1  | -0.253187 | -0.984220 | -1.089791 |
| 7  | -0.944503 | -0.708806 | 0.858747  |
| 6  | -0.598117 | -0.823342 | 2.154268  |
| 16 | -2.545801 | -1.388118 | 0.339215  |
| 8  | -3.427686 | -1.092860 | 1.452451  |
| 8  | -2.754144 | -0.865104 | -0.996015 |
| 6  | -2.274044 | -3.131225 | 0.265382  |
| 6  | -1.625593 | -5.846851 | 0.243939  |
| 6  | -1.721603 | -3.698973 | -0.884090 |
| 6  | -2.473738 | -3.895964 | 1.415241  |
| 6  | -2.157030 | -5.247205 | 1.388626  |
| 6  | -1.408884 | -5.048067 | -0.887211 |
| 1  | -1.561758 | -3.085073 | -1.765333 |
| 1  | -2.907776 | -3.434761 | 2.295816  |
| 1  | -2.333113 | -5.853367 | 2.273223  |
| 1  | -0.991901 | -5.498081 | -1.784229 |
| 6  | -1.327237 | -7.313020 | 0.212990  |
| 1  | -0.467966 | -7.539330 | -0.421958 |
| 1  | -2.176860 | -7.875495 | -0.189774 |
| 1  | -1.127524 | -7.707337 | 1.211292  |
| 1  | 1.292394  | 2.007071  | -0.018100 |
| 1  | -1.370784 | -0.675385 | 2.897572  |
| 1  | 0.416635  | -1.082148 | 2.426090  |

-----  
M06L/6-311G\*\* = -1298.51739



7. TS1-S<sub>0</sub>

| Atomic | Coordinates (Angstroms) |           |           |
|--------|-------------------------|-----------|-----------|
| Number | X                       | Y         | Z         |
| 1      | 2.357647                | 1.179302  | 1.500883  |
| 6      | 3.267537                | 1.074197  | 0.920352  |
| 6      | 5.613684                | 0.884574  | -0.562275 |
| 6      | 3.231230                | 0.441494  | -0.347702 |
| 6      | 4.446084                | 1.592892  | 1.423419  |
| 6      | 5.630205                | 1.498150  | 0.693168  |
| 6      | 4.439571                | 0.375926  | -1.086808 |
| 1      | 4.440281                | 2.079577  | 2.394293  |
| 1      | 6.554009                | 1.898704  | 1.098057  |
| 1      | 4.434293                | -0.107352 | -2.058334 |
| 1      | 6.536697                | 0.798816  | -1.129501 |
| 6      | 2.028111                | -0.121785 | -0.855858 |
| 8      | 1.966841                | -0.372591 | -2.183515 |
| 6      | 0.754390                | -0.192535 | -0.078787 |
| 7      | 0.107062                | -1.469526 | -0.414751 |
| 6      | 0.967636                | -2.536270 | -0.107334 |
| 16     | -1.408090               | -1.661454 | 0.589942  |
| 8      | -2.021511               | -2.879639 | 0.094979  |
| 8      | -0.997760               | -1.517872 | 1.982750  |
| 6      | -2.446706               | -0.277298 | 0.199018  |
| 6      | -4.222280               | 1.815734  | -0.277186 |
| 6      | -2.506528               | 0.788198  | 1.094291  |
| 6      | -3.249976               | -0.309328 | -0.936335 |
| 6      | -4.127570               | 0.740108  | -1.166264 |
| 6      | -3.391835               | 1.825612  | 0.848039  |
| 1      | -1.883525               | 0.775689  | 1.982228  |
| 1      | -3.203969               | -1.161858 | -1.605432 |
| 1      | -4.767900               | 0.717569  | -2.043444 |
| 1      | -3.455573               | 2.652758  | 1.549712  |
| 6      | -5.223105               | 2.906010  | -0.497702 |
| 1      | -4.898628               | 3.850190  | -0.056085 |
| 1      | -6.182105               | 2.649326  | -0.034534 |
| 1      | -5.416659               | 3.071928  | -1.559057 |
| 1      | 1.175451                | -0.911818 | -2.332032 |

|   |          |           |           |
|---|----------|-----------|-----------|
| 1 | 1.593306 | -2.472873 | 0.795212  |
| 1 | 0.625305 | -3.518543 | -0.425015 |
| 1 | 0.061729 | 0.626239  | -0.335679 |
| 1 | 0.966411 | -0.130972 | 0.996974  |

-----  
M06L/6-311G\*\* = -1298.5032994

8. Pro-S<sub>0</sub>

| Atomic<br>Number | Coordinates (Angstroms) |           |           |
|------------------|-------------------------|-----------|-----------|
|                  | X                       | Y         | Z         |
| 1                | 4.393628                | -1.211526 | -0.031121 |
| 6                | 3.902313                | -0.246204 | -0.015292 |
| 6                | 2.622053                | 2.222794  | 0.025822  |
| 6                | 2.509010                | -0.196134 | -0.013556 |
| 6                | 4.647533                | 0.928638  | 0.003553  |
| 6                | 4.013002                | 2.164751  | 0.024661  |
| 6                | 1.876202                | 1.051603  | 0.007430  |
| 1                | 5.731989                | 0.875047  | 0.003085  |
| 1                | 4.597629                | 3.079292  | 0.040427  |
| 1                | 0.788298                | 1.111828  | 0.010356  |
| 1                | 2.115935                | 3.183697  | 0.043030  |
| 6                | 1.686951                | -1.453812 | -0.025165 |
| 8                | 2.549704                | -2.568590 | -0.052326 |
| 6                | 0.549991                | -1.559100 | -1.073497 |
| 1                | 0.719503                | -2.235806 | -1.914065 |
| 1                | 0.219699                | -0.581075 | -1.444699 |
| 7                | -0.315728               | -2.110970 | -0.009375 |
| 6                | 0.576078                | -1.587337 | 1.046948  |
| 16               | -1.967270               | -1.795271 | 0.021821  |
| 8                | -2.479832               | -2.277897 | -1.245026 |
| 8                | -2.427122               | -2.268037 | 1.311429  |
| 6                | -2.086453               | -0.016805 | 0.013388  |
| 6                | -2.118456               | 2.777612  | -0.013080 |
| 6                | -2.065838               | 0.685158  | 1.217128  |
| 6                | -2.127980               | 0.662345  | -1.203088 |
| 6                | -2.147559               | 2.050403  | -1.206825 |
| 6                | -2.084331               | 2.073340  | 1.194419  |

|   |           |           |           |
|---|-----------|-----------|-----------|
| 1 | -2.071575 | 0.138023  | 2.154230  |
| 1 | -2.179228 | 0.097032  | -2.127893 |
| 1 | -2.197792 | 2.581991  | -2.152865 |
| 1 | -2.085434 | 2.622887  | 2.131372  |
| 6 | -2.116863 | 4.274764  | -0.027713 |
| 1 | -2.585157 | 4.688106  | 0.867604  |
| 1 | -2.640579 | 4.670443  | -0.900166 |
| 1 | -1.093867 | 4.665606  | -0.063710 |
| 1 | 1.997982  | -3.357454 | -0.057556 |
| 1 | 0.254870  | -0.617904 | 1.449166  |
| 1 | 0.764598  | -2.284969 | 1.865878  |

-----  
M06L/6-311G\*\* = -1298.5840961

9. Int-T<sub>1</sub>

-----

| Atomic<br>Number | Coordinates (Angstroms) |           |           |
|------------------|-------------------------|-----------|-----------|
|                  | X                       | Y         | Z         |
| 6                | -2.125310               | -0.761547 | -0.552703 |
| 8                | -2.609307               | -2.020551 | -0.431346 |
| 6                | -0.745023               | -0.595018 | -1.106983 |
| 1                | -0.328760               | 0.374362  | -0.822396 |
| 1                | -0.748263               | -0.618676 | -2.208786 |
| 7                | 0.189562                | -1.643433 | -0.689906 |
| 6                | 0.050269                | -2.918668 | -1.225710 |
| 1                | 0.692372                | -3.684924 | -0.812771 |
| 1                | -0.202310               | -2.939349 | -2.281398 |
| 16               | 0.977617                | -1.421700 | 0.819666  |
| 8                | 0.034690                | -0.821167 | 1.739981  |
| 8                | 1.651666                | -2.674728 | 1.084240  |
| 6                | -3.013190               | 0.306488  | -0.296809 |
| 6                | -4.833399               | 2.405856  | 0.227675  |
| 6                | -4.351281               | 0.041368  | 0.103248  |
| 6                | -2.626627               | 1.667179  | -0.422867 |
| 6                | -3.522156               | 2.686596  | -0.161713 |
| 6                | -5.232623               | 1.073125  | 0.355962  |
| 1                | -4.666546               | -0.989953 | 0.207928  |
| 1                | -1.616966               | 1.923189  | -0.729279 |

|   |           |           |           |
|---|-----------|-----------|-----------|
| 1 | -3.198198 | 3.717855  | -0.264605 |
| 1 | -6.249689 | 0.841478  | 0.658780  |
| 1 | -5.531958 | 3.211636  | 0.426293  |
| 6 | 2.177224  | -0.188103 | 0.385523  |
| 6 | 4.101371  | 1.723801  | -0.249236 |
| 6 | 2.044796  | 1.104882  | 0.882170  |
| 6 | 3.252637  | -0.543412 | -0.428093 |
| 6 | 4.201329  | 0.414460  | -0.742127 |
| 6 | 3.011415  | 2.050691  | 0.560219  |
| 1 | 1.199463  | 1.351271  | 1.516871  |
| 1 | 3.339906  | -1.559868 | -0.801376 |
| 1 | 5.041951  | 0.146323  | -1.376540 |
| 1 | 2.919974  | 3.061569  | 0.949395  |
| 6 | 5.160430  | 2.734622  | -0.560956 |
| 1 | 6.036005  | 2.590675  | 0.082534  |
| 1 | 4.806767  | 3.755656  | -0.402901 |
| 1 | 5.509244  | 2.648574  | -1.592824 |
| 1 | -1.887350 | -2.660955 | -0.582838 |

-----  
M06L/6-311G\*\* = -1298.511982

10. TS2-T<sub>1</sub>

| Atomic<br>Number | Coordinates (Angstroms) |           |           |
|------------------|-------------------------|-----------|-----------|
|                  | X                       | Y         | Z         |
| 1                | 2.072498                | 0.932848  | 1.514939  |
| 6                | 2.983873                | 0.991622  | 0.926991  |
| 6                | 5.433208                | 0.916817  | -0.492676 |
| 6                | 3.080028                | 0.261565  | -0.350359 |
| 6                | 4.020574                | 1.751505  | 1.358561  |
| 6                | 5.258969                | 1.787909  | 0.640286  |
| 6                | 4.411121                | 0.160267  | -0.956193 |
| 1                | 3.924244                | 2.324531  | 2.277387  |
| 1                | 6.080643                | 2.399650  | 0.994014  |
| 1                | 4.540477                | -0.503504 | -1.803001 |
| 1                | 6.407785                | 0.860124  | -0.967036 |
| 6                | 1.952830                | -0.337731 | -0.952695 |
| 8                | 2.127776                | -0.699556 | -2.282424 |

|    |           |           |           |
|----|-----------|-----------|-----------|
| 6  | 0.529566  | 0.096740  | -0.619440 |
| 7  | 0.004431  | -1.281205 | -0.451235 |
| 6  | 1.297706  | -1.900815 | -0.165715 |
| 16 | -1.116256 | -1.479665 | 0.828967  |
| 8  | -1.592903 | -2.844764 | 0.733957  |
| 8  | -0.527310 | -0.979765 | 2.066855  |
| 6  | -2.370654 | -0.332414 | 0.329146  |
| 6  | -4.354066 | 1.474861  | -0.415803 |
| 6  | -2.570647 | 0.815471  | 1.088713  |
| 6  | -3.138019 | -0.590067 | -0.804090 |
| 6  | -4.119559 | 0.318030  | -1.168915 |
| 6  | -3.562444 | 1.708614  | 0.711615  |
| 1  | -1.958112 | 0.985689  | 1.967397  |
| 1  | -2.966508 | -1.492879 | -1.381165 |
| 1  | -4.724367 | 0.126449  | -2.050694 |
| 1  | -3.730793 | 2.602916  | 1.305161  |
| 6  | -5.452575 | 2.420908  | -0.785503 |
| 1  | -5.234133 | 3.440348  | -0.461500 |
| 1  | -6.392983 | 2.127169  | -0.306341 |
| 1  | -5.633019 | 2.434334  | -1.862119 |
| 1  | 1.355791  | -1.218531 | -2.537277 |
| 1  | 1.567821  | -1.995907 | 0.892662  |
| 1  | 1.535250  | -2.776308 | -0.774534 |
| 1  | 0.040047  | 0.650359  | -1.429093 |
| 1  | 0.484477  | 0.678771  | 0.305723  |

-----  
M06L/6-311G\*\* = -1298.4291847

11. T<sub>1</sub>/S<sub>0</sub>-I

| Atomic<br>Number | Coordinates (Angstroms) |             |            |
|------------------|-------------------------|-------------|------------|
|                  | X                       | Y           | Z          |
| 1                | -4.4308109              | -11.6095572 | -0.8922872 |
| 6                | -5.3860679              | -12.1147000 | -0.7919646 |
| 6                | -7.8298626              | -13.4348641 | -0.5328001 |
| 6                | -6.5425102              | -11.5718713 | -1.4055113 |
| 6                | -5.4708272              | -13.2837291 | -0.0582551 |
| 6                | -6.6852552              | -13.9554533 | 0.0748280  |

|    |            |             |            |
|----|------------|-------------|------------|
| 6  | -7.7691934 | -12.2638263 | -1.2614523 |
| 1  | -4.5761237 | -13.6846384 | 0.4067546  |
| 1  | -6.7404165 | -14.8780873 | 0.6421015  |
| 1  | -8.6605990 | -11.8580035 | -1.7259501 |
| 1  | -8.7774043 | -13.9545974 | -0.4333981 |
| 6  | -6.4614660 | -10.3711801 | -2.1524736 |
| 8  | -7.5378607 | -10.0323802 | -2.9014502 |
| 6  | -5.1701509 | -9.6546137  | -2.4003900 |
| 7  | -4.7655697 | -9.0841723  | -1.1206891 |
| 6  | -5.7812879 | -8.3373756  | -0.5675153 |
| 16 | -3.0967615 | -8.5237391  | -1.0130507 |
| 8  | -3.0212231 | -7.8746641  | 0.2800511  |
| 8  | -2.2858012 | -9.6720280  | -1.3758920 |
| 6  | -2.9754368 | -7.3084476  | -2.2910342 |
| 6  | -3.0577703 | -5.4798229  | -4.3988509 |
| 6  | -2.4579672 | -7.6667735  | -3.5338949 |
| 6  | -3.5564550 | -6.0544198  | -2.0930670 |
| 6  | -3.5907568 | -5.1540519  | -3.1473424 |
| 6  | -2.4921589 | -6.7473195  | -4.5711162 |
| 1  | -2.0208428 | -8.6510215  | -3.6663026 |
| 1  | -3.9472760 | -5.7907257  | -1.1159083 |
| 1  | -4.0311969 | -4.1724303  | -2.9965146 |
| 1  | -2.0706266 | -7.0125442  | -5.5362920 |
| 6  | -3.0627348 | -4.4857142  | -5.5172823 |
| 1  | -2.9082470 | -4.9675509  | -6.4844679 |
| 1  | -2.2604251 | -3.7514770  | -5.3894051 |
| 1  | -3.9996068 | -3.9252942  | -5.5600361 |
| 1  | -7.3876056 | -9.1602824  | -3.2833287 |
| 1  | -5.6080565 | -7.9337597  | 0.4218540  |
| 1  | -6.5015836 | -7.8486479  | -1.2245170 |
| 1  | -5.3371188 | -8.8587672  | -3.1516496 |
| 1  | -4.3707641 | -10.2993550 | -2.7868438 |

Difference Gradient:

|    |             |             |             |
|----|-------------|-------------|-------------|
| -1 | 0.00000325  | 0.00058684  | 0.00262671  |
| -2 | -0.00245395 | -0.00536354 | 0.00778704  |
| -3 | 0.00218578  | -0.00129680 | 0.00063548  |
| -4 | 0.00278099  | 0.01082167  | -0.00491334 |
| -5 | 0.00342244  | 0.00241755  | -0.00560080 |
| -6 | -0.00419579 | -0.00432871 | 0.00136165  |
| -7 | -0.00218427 | 0.00053569  | 0.00186215  |

|     |             |             |             |
|-----|-------------|-------------|-------------|
| -8  | 0.00049051  | -0.00046088 | 0.00012498  |
| -9  | -0.00024538 | 0.00038527  | 0.00110410  |
| -10 | 0.00005509  | 0.00005294  | -0.00052135 |
| -11 | -0.00030165 | -0.00032359 | 0.00006045  |
| -12 | 0.03769155  | -0.05484591 | -0.03565190 |
| -13 | -0.02388014 | 0.02191846  | -0.00801072 |
| -14 | -0.01954286 | -0.01178081 | -0.00721866 |
| -15 | -0.00533894 | 0.02530214  | -0.00101121 |
| -16 | 0.03960716  | 0.03995267  | 0.03162945  |
| -17 | -0.00835574 | -0.01350840 | 0.01880458  |
| -18 | 0.00065124  | -0.00119313 | -0.00685552 |
| -19 | -0.00748951 | 0.00775586  | -0.00305593 |
| -20 | -0.00758315 | 0.00067514  | -0.00545925 |
| -21 | 0.00114107  | -0.00175638 | -0.00093600 |
| -22 | 0.00058908  | -0.00223308 | 0.00216755  |
| -23 | 0.00125763  | -0.00027400 | -0.00058550 |
| -24 | 0.00041325  | 0.00029824  | 0.00208640  |
| -25 | 0.00021369  | 0.00248883  | -0.00051528 |
| -26 | -0.00030192 | 0.00014062  | -0.00013367 |
| -27 | -0.00075868 | 0.00020195  | 0.00006669  |
| -28 | 0.00022107  | -0.00039524 | 0.00015323  |
| -29 | -0.00042999 | -0.00013209 | 0.00048988  |
| -30 | -0.00034271 | -0.00030992 | -0.00028966 |
| -31 | 0.00000879  | 0.00004973  | 0.00034006  |
| -32 | -0.00019246 | -0.00037869 | 0.00032389  |
| -33 | 0.00022186  | -0.00018972 | 0.00023489  |
| -34 | -0.00269221 | -0.00472080 | 0.00069758  |
| -35 | 0.00001241  | 0.00141356  | -0.00025128 |
| -36 | -0.00693581 | -0.00914696 | 0.00127743  |
| -37 | 0.00345467  | 0.00045601  | 0.00148040  |
| -38 | -0.00119635 | -0.00281452 | 0.00569546  |

-----  
M06L/6-311G\*\* = -1298.5035138900
